1 **The Need for Sustainable Leadership in Academia – a German Case**  
2 **Study**

3  
4 Verena Haage<sup>1,2,3\*</sup>, Linn Voss<sup>3</sup>, Daniela Nguyen<sup>3</sup>, Friderike Eggert<sup>3</sup>  
5

6 <sup>1</sup>Max Delbrück Center for Molecular Medicine, Helmholtz Association, Germany

7 <sup>2</sup>Institute of Virology, Charité-Universitätsmedizin Berlin, Corporate Member of Freie  
8 Universität Berlin, Humboldt-Universität zu Berlin, and Berlin Institute of Health, Berlin,  
9 Germany

10

11 <sup>3</sup>Sustainable Leadership for Science Initiative, Berlin, Germany

12 \*Correspondence: Verena Haage, Max Delbrück Center for Molecular Medicine, Helmholtz  
13 Association, Germany; Email: [verena.haage@mdc-berlin.de](mailto:verena.haage@mdc-berlin.de)

14

15

16 **Abstract**

17 Academic leaders are selected based on their publication record, citation index and  
18 acquisition of third party funding. However, heading a successful research team, also  
19 requires leadership skills. Despite the clear need, leadership development has been  
20 systematically neglected in the present academic system. At the same time, growing  
21 evidence suggests that leadership styles of academic supervisors can dramatically  
22 affect the mental health of academic employees as well as drive highly skilled  
23 researchers out of academia. Here, we assessed the current state of academic  
24 leadership in the German academic system by surveying 368 participants currently  
25 employed in academia in Germany. We report that 64% of current academic leaders  
26 did not feel prepared for their current position while 86% of participants expressed their  
27 interest in leadership development programs offered by their research institutions. Our  
28 results highlight the demand for leadership development programs in German  
29 academic institutions to ensure a more efficient academic system.

30

## 31 **Introduction**

32 Success in science is measured through a combination of scientific output in the form  
33 of publications in scientific journals and the acquisition of funding in order to enable  
34 further research (1, 2). As young researchers advance in their careers, they become  
35 highly trained in skills such as scientific writing so as to master publication or grant  
36 writing. The mediation of leadership skills, however, is often neglected as currently  
37 these do not contribute to the evaluation of scientific success or the appointment to  
38 faculty positions (1). Therefore, an early career researcher (ECR) may become leader  
39 of a research group based on publication record and solicitation of third party funding,  
40 but without having received sufficient training of team leadership or team development  
41 (3). A recent study focusing on leadership in academia, identified the neglect of  
42 systematic leader selection and development as one of the most pressing challenges  
43 in academic leadership, besides managing autonomy, constant change and  
44 uncertainty (4). According to the authors, academic leaders are not prepared for their  
45 demanding roles (4). Moreover, a survey including 233 professors from universities in  
46 the United Kingdom revealed that 60% indicated their research output and  
47 scholarships as the sole basis for their appointment (5).

48 In order to combat the so called “Peter Principle” (6) in academia, which states that  
49 *“members of an organization where promotion is based on achievement, success, and*  
50 *merit will eventually be promoted beyond their level of ability”*, researchers should be  
51 sufficiently trained in leadership skills for the new set of challenges and responsibilities  
52 they will face upon reaching a leading position. In fact, leadership has been considered  
53 as key to academic success (7) and combined approaches of individual as well as  
54 collective leadership have been suggested for successful research leadership (4). At  
55 the same time, growing evidence suggests that the leadership style of academic  
56 supervisors can dramatically affect mental health of academic employees, especially

57 of PhD students (8, 9). Moreover, managing students with mental health issues can  
58 also pose enormous challenges on untrained supervisors (10), creating an  
59 unsustainable circle of insecurity and overstress due to lack of leadership skills.

60 Despite growing movements to advance practical and robust approaches for research  
61 assessment such as the San Francisco Declaration on Research Assessment (DORA)  
62 (11), similar movements with regard to advancing leadership skill development for  
63 academic offspring are currently rare.

64 Moreover, studies reflecting on the current status of research leadership are scarce.  
65 Here we surveyed 368 participants currently working in academia in Germany on their  
66 perception and experience of leadership in the German academic system, highlighting  
67 the current situation as well as the needs for change towards a more sustainable  
68 academic environment.

69

## 70 **Materials and Methods**

71 The survey (Supplementary file 1) was created using the online tool SurveyPlanet and  
72 was conducted using convenience sampling with dissemination via forwarded email  
73 invitations or shared via LinkedIn, and remained open for six weeks. A pilot version of  
74 the survey was originally conducted with 4–8 doctoral researchers/PhD students of  
75 scientific research institutions in Berlin. Based on this pilot run, some questions were  
76 revised. 709 participants completed the survey. The survey was originally planned to  
77 give an international overview on the topic, since however 88.7% (629) of participants  
78 are currently working in German research institutions/academia, the subsequent  
79 analysis was focused on German academia. When asked about their highest academic  
80 degree, 7% (44) of participants stated high school diploma. According to our definition,  
81 participants should have at least a university degree to take part in a survey focused  
82 on academic leadership. For these reasons, participants who are currently fresh

83 students but do not yet have a university degree were excluded from further analysis.  
84 Further, participants currently working in academia in Germany with at least one  
85 academic degree (585), were currently not all employed in academia, in fact 37% (217)  
86 of participants were currently working outside of academia, while 63% (368) of  
87 participants worked in academic institutions. In order to depict the current status of  
88 leadership in the German academic system, the analysis was therefore further focused  
89 on all participants currently working in the German academic system (368). All the  
90 descriptive statistics reported in this article are for these 368 respondents.

91

## 92 **Results**

93 We surveyed 585 international academics currently working in Germany on their  
94 experience in leadership culture in academia, their needs for supporting leadership  
95 skill development as well as their openness towards novel leadership concepts in  
96 academia (see Methods for information on how the survey was disseminated).

97 Out of the surveyed German academic participants, 63% (368) are currently employed  
98 in academia, 34% (197) indicated to work outside of academia or research while 3%  
99 (20) indicated employment as scientists outside of academia. The latter two groups  
100 show experience in academia, but are currently employed in a variety of professions  
101 outside of academia; in order to reflect the current situation in academia the analysis  
102 was therefore focused on the 368 academics that are currently employed in academia.  
103 60% (221) of participants were women, 38% (139) were men with an average age of  
104 31 years ranging from 21 to 82 years.

105 The majority of participants held a PhD/MD (41%) indicating substantial experience in  
106 academic culture, followed by 38% holding a Master's degree, while a minor part of  
107 participants held a Bachelor's degree (21%) (Figure 1A). When asked about their  
108 current position in academia, 16% specified as Group Leaders or Professors, 19% as

109 Postdoctoral Researchers (Post Docs), 31% as PhD Students, 14% as Research  
110 Assistants (defined as a graduate who is employed on a temporary or part-time basis  
111 to assist the university or research institution with academic research) and 20% as  
112 students (Figure 1B).

113 Surveyed participants currently working in academia were further asked about their  
114 plans regarding academia. 46% indicated to plan to stay in academia (“Yes”; 55%  
115 women, 38% men), 26% (“No”; 57% women, 42% men) are planning to leave  
116 academia and 23% (“Maybe”; 72% women, 27% men) are currently undecided  
117 regarding their professional future in academia (Figure 1C). While the gender ratio was  
118 similar for staying or leaving academia (“Yes” or “No”), noticeably more women than  
119 men indicated indecisiveness (“Maybe”) regarding their future in academia. Moreover,  
120 many participants stating that they were undecided expressed their desire to stay in  
121 academia but expressed their doubts on combining a career in science with family  
122 planning, due to long working hours and short-term contracts.

123

124 When the 37% of surveyed participants that already left academia were asked about  
125 their motivation to leave, reasons were manifold; the majority, however, stated that  
126 they were concerned about poor career prospects and a lack of job security,  
127 underscoring widespread concerns of participants working in academia.

128

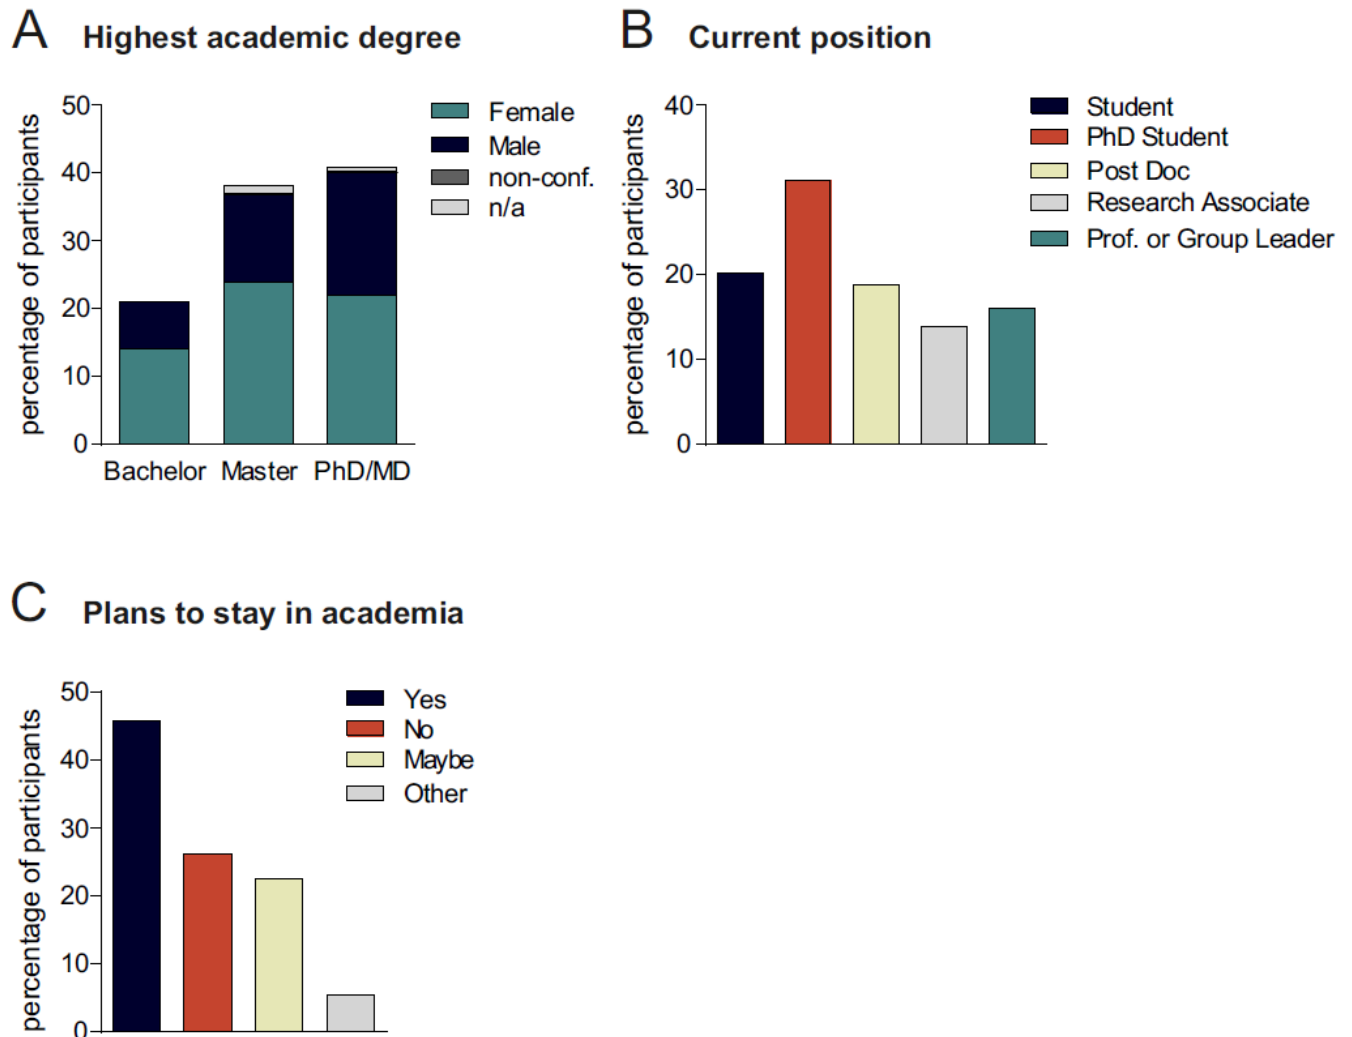

129

130

131 **Figure 1. Survey demographics.** **A.** Distribution of participants based on highest  
132 academic degree ranging from Bachelor, Master to PhD or MD including gender  
133 distribution. **B.** Current academic position of participants ranging from Student (cyan),  
134 to PhD Student (orange), Post Doc (lime green), Research Associate (light grey) to  
135 Professor or Group Leader (turquoise). **C.** Percentage of participants planning to stay  
136 in academia (Yes; cyan), to leave academia (No; orange), is undecided (maybe; lime  
137 green), answered other (light grey). n/a: no data available.

138

139

140

141 **Academics feel unprepared for leadership in academia**

142 We further assessed whether participants working in academia feel prepared for  
143 leadership in academic environments. Out of the surveyed academic participants, 59%  
144 indicated to be currently in a leading position (53% women, 45% men) while 41%  
145 stated to be currently not in a leading position (70% women, 27% men) (Figure 2A).  
146 When asked about their plans regarding leadership, out of the 41% that are currently  
147 not in a leading position, 78% indicated to be pursuing a leading position (58% women;  
148 38% men) while only 15% stated not to aim for a leading position (74% women; 26%  
149 men) (Figure 2B).

150  
151 Despite the majority of participants aiming for a leading position in academia, 77% of  
152 all academic participants stated that they were not well prepared for a leading position  
153 during their academic career (Figure 2C). When focusing on the current leaders in  
154 academia, 73% also stated that they did not feel well prepared for the leading position  
155 they currently hold (54% women, 44% men; Figure 2D).

156 When academics currently working outside of academia were asked regarding their  
157 preparedness for leadership, 51.8% of current leaders did not feel prepared for their  
158 position (Supplementary File 2).

159

160

161

162

163

164

165

166

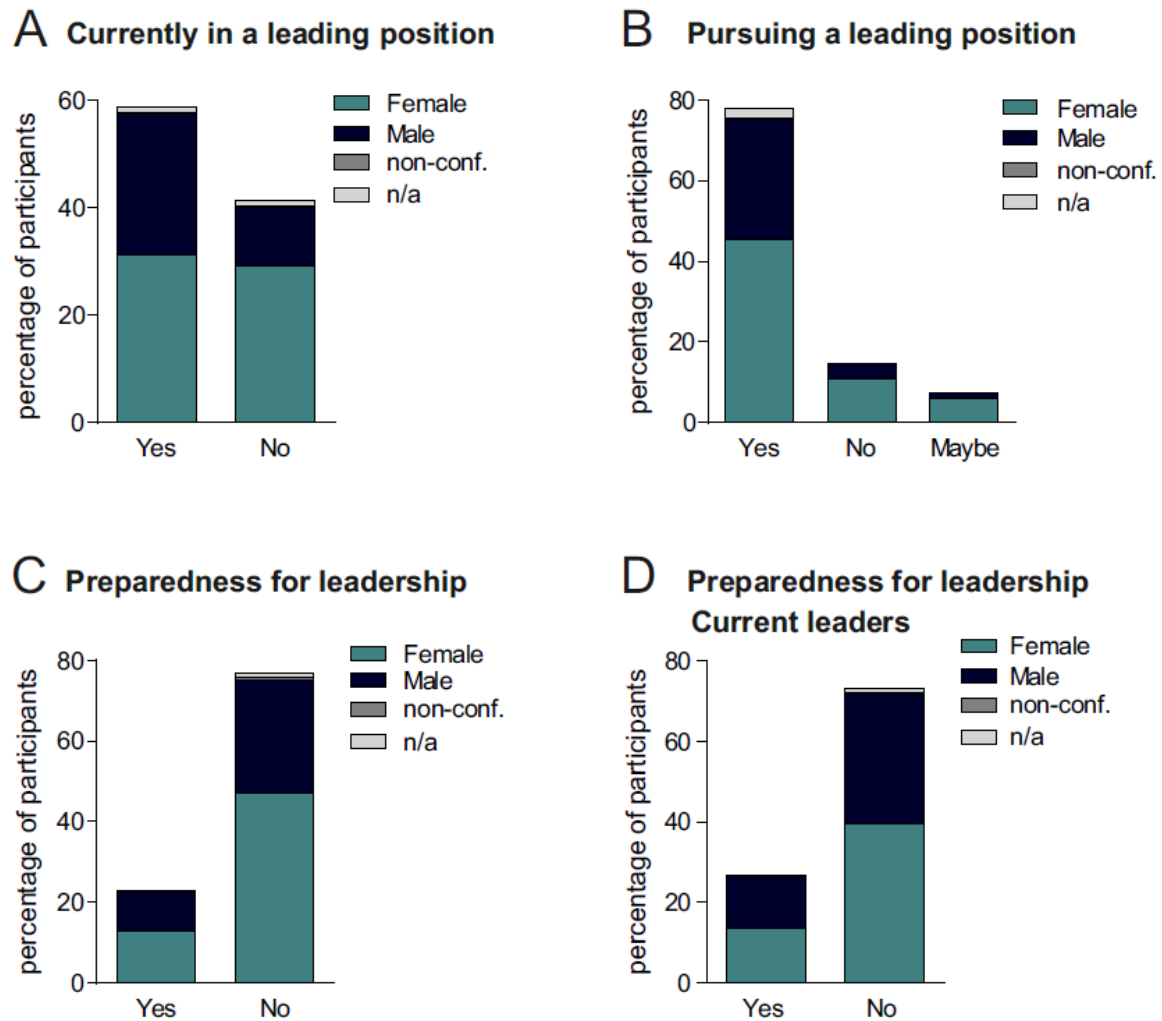

167

168

169 **Figure 2. Leadership status of participants.** **A.** Percentage of participants currently  
170 holding a leading position (Yes) and currently not holding a leading position (No)  
171 including gender distribution within each group. **B.** Percentage of participants pursuing  
172 (Yes), potentially pursuing (Maybe) and not pursuing (No) a leading position including  
173 gender distribution within each group. **C.** Percentage of current leaders that feel  
174 prepared (Yes) or not prepared (No) for a leading position. **D.** Percentage of current  
175 non-leaders that felt prepared (Yes) or not prepared (No) for a leading position. n/a: no  
176 data available.

177

178



179 **Academics are interested in leadership development programs and expect**  
180 **institutions to act**

181

182 To better understand the needs of the academic community, we assessed their interest  
183 in leadership training opportunities as well as the format and conditions of such offers.  
184 84% of participants indicated their interest in a training or coaching program supporting  
185 their leadership development (Figure 3A). When asked about the format they would  
186 prefer for leadership skill development, interests were diverse ranging from network  
187 building, to personal coaching to workshops as well as lectures or online seminars  
188 (Figure 3B).

189 About 62% of current leaders also expressed their interest in participating in leadership  
190 development training together with their team (Figure 3C).

191

192 Having defined the needs of the academic community, we further examined the role of  
193 academic institutions in the development of leadership skills, where 86% of participants  
194 stated their interest in such offers provided by their research institutions (Figure 3D).

195

196

197

198

199

200

201

202

203

204

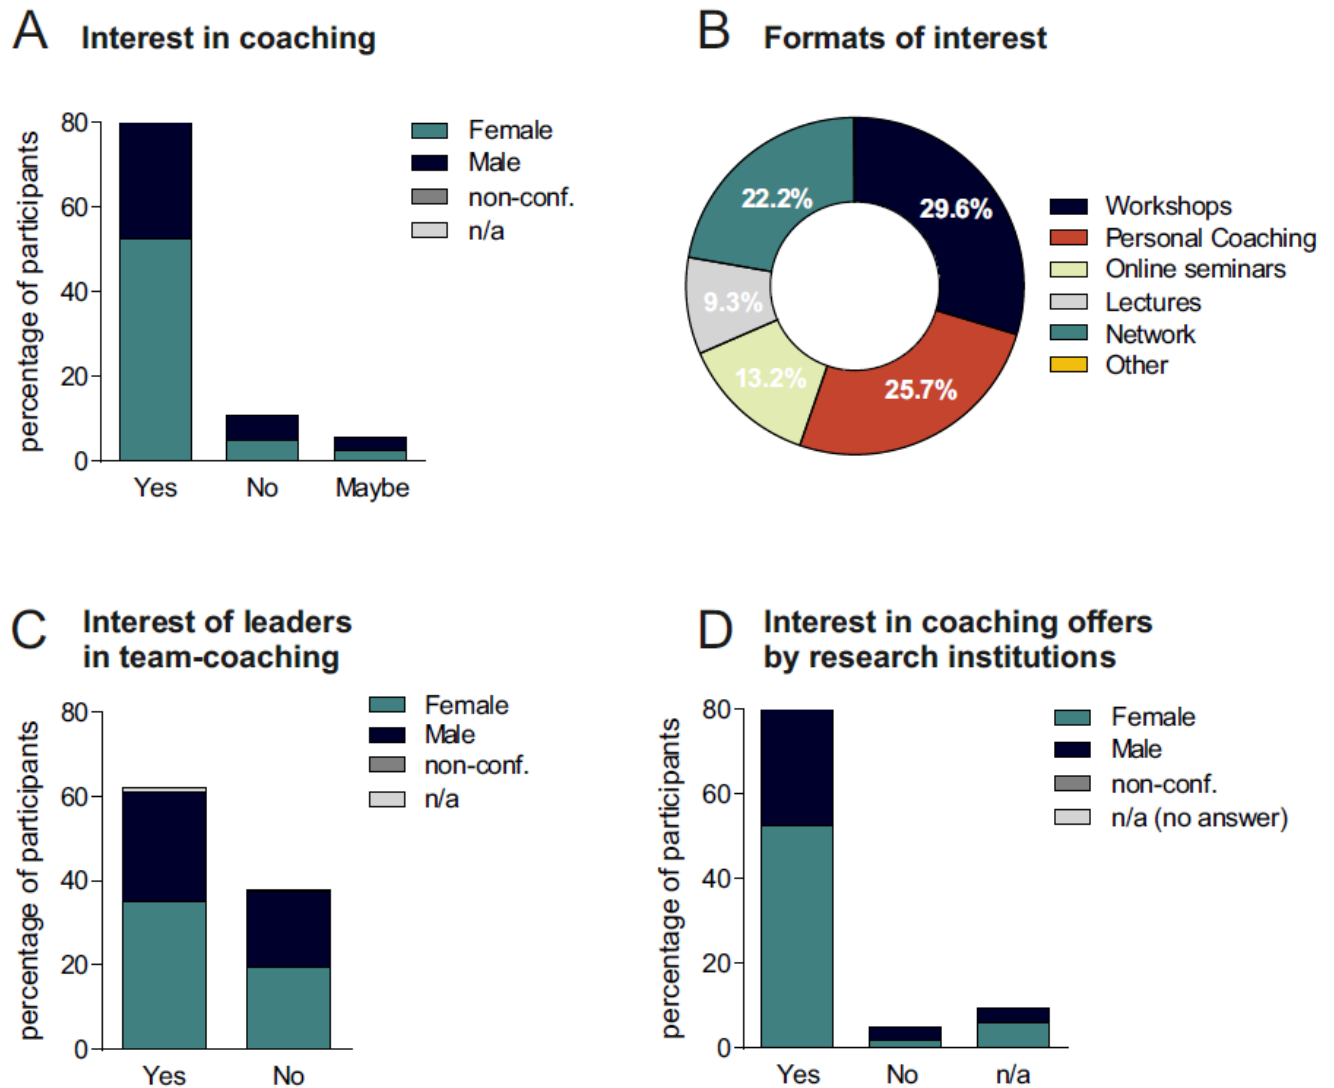

205

206

207 **Figure 3. Interest in leadership training. A.** Percentage of participants that is

208 interested (Yes), potentially interested (Maybe), not interested (No) in coaching.

209 **B.** Percentage of participants interested in different formats for leadership training

210 including workshops (cyan), personal coaching (orange), online seminars (lime green),

211 lectures (light grey), network building (turquoise), other (yellow). **C.** Percentage of

212 current academic leaders interested (Yes) or not interested (No) in team-coaching. **D.**

213 Percentage of participants interested (Yes) or not interested (No) in coaching offers by

214 research institutions. n/a: no data available.

215

216

217

## 218 **Discussion**

219 We here report a great need for leadership training programs in academia, based on  
220 data from our survey on the current state of leadership in academia in Germany. 64%  
221 of current academic leaders stated that they did not feel well prepared for the position  
222 they are currently holding while 86% of all participating academics currently employed  
223 in academia expressed their interest in leadership programs offered by their research  
224 institutions.

225  
226 In current debates about academic leadership, leadership is usually defined from the  
227 perspective of a group leader or professor. From our point of view however, leadership  
228 in science starts at an earlier stage, since in order to supervise or mentor another  
229 student, a common scenario in the course of a PhD, leadership skills are already  
230 required. Here, we therefore defined leadership as an early occurring event in the  
231 course of a scientific career. Despite our definition of leadership, the majority of leaders  
232 participating in our survey were at more advanced career stages as 90% of participants  
233 held a Master's degree, an MD or PhD degree. More advanced career stages  
234 however, indicating more time spent in academia, did not result in better preparedness  
235 for leadership, underscoring the need for leadership training at every career stage.

236  
237 Due to the high number of German participants, our survey focused on German  
238 academia, reflecting the current state on leadership in academia in only one, but one  
239 of the leading countries in academic research. Research culture however might differ  
240 between countries and our data are therefore not suitable for a general statement on  
241 the current state of leadership in academia. Thus, more international studies will be  
242 required to confirm our data as well as to paint a more complete picture of the current  
243 state on academic leadership.

244 It is beyond debate that leadership in academia is of high complexity. Academic  
245 leaders are required to meet the interests of a spectrum of different stakeholders (12),  
246 while being held to the highest standards regarding their excellence in research and  
247 teaching (13). At the same time, academic leadership ranges across multiple levels,  
248 from an individual level, to the level of a research group to the organization (4, 14).

249

250 To date, only a few studies on the actual state of leadership in academia exist. One  
251 study that surveyed academic leaders from Chinese and European universities,  
252 reports a lack of comprehensive conceptualization of academic leadership, providing  
253 a new definition of academic leadership based from an international academic context:  
254 “an influence of one or more people with an academic profile on academic behavior,  
255 attitudes or intellectual capacity of others based on commitment and power in order to  
256 achieve managerial, structural, and institutional vision values” (15). Another study  
257 highlights the fact that many current academic leaders are actually not aware of their  
258 role in improving teaching quality at universities or learning success of their students  
259 (16). On these lines, a recent study underscores the importance of sustainable  
260 leadership practices in universities to ensure quality learning and teaching (17).  
261 According to the authors, one important component of sustainable leadership practice  
262 includes providing adequate developmental opportunities for those who are likely to  
263 become leaders of learning and teaching (17).

264

265 Similarly, our data indicate the need for leadership training for future academic leaders  
266 and at the same time their interest in such training.

267 Synergies from interdisciplinary collaborations, effective organization as well as  
268 diverse environments maximize the use of resources and implement a sustainable

269 science culture in which researchers have the right framework and opportunities to  
270 focus on their projects.

271

272 One way to improve scientific leadership could be training in leadership programs that  
273 use leadership skills and working frameworks that have been applied successfully in  
274 other fields. For example, concepts such as New Work and Agility, originating in the  
275 start-up world, aim to realize an improved, innovative and creative work culture, similar  
276 to the scientific field (18, 19). These concepts are based on self-motivation and  
277 creativity, which makes them suitable for scientists, who are also strongly motivated  
278 by purpose (20, 21). Therefore, it would be plausible to incorporate them in scientific  
279 leadership training. Pioneer organizations such as the German Scholarship  
280 Organization are developing programs for scientific leaders that support the  
281 development of expertise exceeding the knowledge acquisition and scientific-work-  
282 centered education (22).

283

284 Our data indicate that the majority of current leaders in the German academic system  
285 was not prepared for their position; however, they expressed great interest in training  
286 courses that could be offered by institutions, highlighting the role of institutions in  
287 supporting the development of future scientific leaders. By investing in leadership  
288 competencies, research institutions and universities may sustainably raise the  
289 potential of academic excellence (23). Additionally, by sensitizing future academic  
290 leaders towards general obstacles facing when pursuing a scientific career such as  
291 lack of job security, power structures or imposter syndrome, reasons for many  
292 excellent researchers to leave academia, and providing support to them, institutions  
293 might contribute to sustain more researchers in academia. By promoting diversity

294 among academic leaders, research institutions might additionally contribute to fairer  
295 and better research (24).

296

297 Some institutions have already integrated corresponding courses and are already  
298 leading by example, such as the University of Sheffield providing online resources on  
299 the development of leadership skills (25) or the Leaders Support and Development  
300 Program of the English National Institute for Health Research (NIHR) offering future-  
301 focused leadership programs for current and emerging research leaders (26). The  
302 efficacy of such programs was shown by an Australian study reporting the  
303 development of a career-development training program for early career researchers at  
304 an Australian university as well as its immediate impact on research productivity on the  
305 individual as well as organizational level (27).

306

### 307 **Conclusion**

308 We found that most academics aspire to leading positions but did not feel prepared  
309 and bemoaned a lack of leadership skills in the scientific world. There might be a need  
310 to transform the science work culture from a “stick and carrot” environment where  
311 scientists work solely towards their next publication into a science enthusiasm and  
312 innovation-driven culture.

313 With a need for excellence in times of increasingly complex problems, leadership skills  
314 beyond mere management of teams are needed to tackle scientific questions in global  
315 collaborations. They are also needed provide role models for young researchers and  
316 provide them with future perspectives in the field of academia and a unique framework  
317 to enhance their knowledge and research skills. One answer to this question could be  
318 adopting work and leadership concepts that worked in highly innovative fields of  
319 industry such as agility to the scientific environment.

320 **Competing interests**

321 The authors declare no competing interests.

322

323

324 **References**

325

326

327 1. Detsky AS. 2011. How to be a good academic leader. *Journal of general internal*  
328 *medicine* 26:88-90.

329 2. Fortin J-M, Currie DJ. 2013. Big Science vs. Little Science: How Scientific  
330 Impact Scales with Funding. *PLOS ONE* 8:e65263.

331 3. Lashuel HA. 2020. What about faculty? *Elife* 9.

332 4. Braun SaP, C. and Frey, D. and Knipfer, K. . 2016. Leadership in academia :  
333 individual and collective approaches to the quest for creativity and innovation.  
334 Leadership lessons from compelling contexts Bingley: Emerald: pp. 349-365.

335 5. Macfarlane B. 2011. Professors as intellectual leaders: formation, identity and  
336 role. *Studies in Higher Education* 36:57 - 73.

337 6. Peter LJaH, Raymond. . 1969. The Peter Principle.

338 7. Bryman A. 2007. Effective leadership in higher education: a literature review.  
339 *Studies in Higher Education* 32:693-710.

340 8. Levecque K, Anseel F, De Beuckelaer A, Van der Heyden J, Gisle L. 2017.  
341 Work organization and mental health problems in PhD students. *Research*  
342 *Policy* 46:868-879.

343 9. Christian K, Johnstone C, Larkins JA, Wright W, Doran MR. 2021. A survey of  
344 early-career researchers in Australia. *Elife* 10.

345 10. Loissel E. 2019. A question of support. *Elife* 8.

346 11. <https://sfdora.org/>. Accessed 17.01.2021.

347 12. Milliken J. 1998. The Cult of Academic Leadership. . *Higher Education in Europe*  
348 23(4):505–515.

349 13. Corlett JA. 2005. The good professor. *Journal of Academic Ethics* 3(1):27-54.

350 14. Bolden R, Petrov, G., & Gosling, J. 2009. Distributed leadership in higher  
351 education: What does it accomplish? *Leadership* 5(3):299-310.

352 15. Dinh NBK, Caliskan A, Zhu C. 2020. Academic leadership: Perceptions of  
353 academic leaders and staff in diverse contexts. *Educational Management*  
354 *Administration & Leadership* doi:10.1177/1741143220921192.

355 16. Alenoush Saroyan DG, Engida Gebre. 2011. Understanding academic  
356 leadership, abstr Annual meeting of the American Educational Research  
357 Association,

358 17. Bosanquet A, Cameron A, Marshall S, Orrell J. 2021. Ensuring Sustainable  
359 Leadership for Quality Learning and Teaching.

360 18. Nafei W. 2016. Organizational Agility: The Key to Organizational Success.  
361 *International Journal of Business and Management* 11:296.

362 19. Sherehiy B, Karwowski W. 2014. The relationship between work organization  
363 and workforce agility in small manufacturing enterprises. *International Journal*  
364 *of Industrial Ergonomics* 44:466–473.

365 20. McGee Ebony O, White Devin T, Jenkins Akailah T, Houston S, Bentley Lydia  
366 C, Smith William J, Robinson William H. 2016. Black engineering students'

- 367 motivation for PhD attainment: passion plus purpose. *Journal for Multicultural*  
368 *Education* 10:167-193.
- 369 21. Johnson BB, Dieckmann NF. 2020. Americans' views of scientists' motivations  
370 for scientific work. *Public Underst Sci* 29:2-20.
- 371 22. <https://gsonet.org>. Accessed
- 372 23. Riccio S. 2010. Talent Management in Higher Education: Developing Emerging  
373 Leaders Within the Administration at Private Colleges and Universities.
- 374 24. Aguirre A. 2017. Diversity and Leadership in Higher Education, p 1-8. *In* Teixeira  
375 P, Shin JC (ed), *Encyclopedia of International Higher Education Systems and*  
376 *Institutions* doi:10.1007/978-94-017-9553-1\_533-1. Springer Netherlands,  
377 Dordrecht.
- 378 25. <https://www.sheffield.ac.uk/rs/ecr/training/psrl>. Accessed
- 379 26. [https://www.nihr.ac.uk/explore-nihr/academy-programmes/nihr-leaders-](https://www.nihr.ac.uk/explore-nihr/academy-programmes/nihr-leaders-support-and-development-programme)  
380 [support-and-development-programme](https://www.nihr.ac.uk/explore-nihr/academy-programmes/nihr-leaders-support-and-development-programme).
- 381 27. Browning L, Thompson K, Dawson D. 2014. Developing future research  
382 leaders: Designing early career researcher programs to enhance track record.  
383 *International Journal for Researcher Development* 5:123-134.
- 384
- 385
- 386
